# Supplementary material for: A RAGE-antagonist peptide potentiates polymeric micelle-mediated intracellular delivery of plasmid DNA for acute lung injury gene therapy
Source: Royal Society of Chemistry journal article supplement (doi:10.1039/d0nr01367f), 2020-01-01
Supplement: d0nr01367f1.pdf [file d0nr01367f1.pdf]

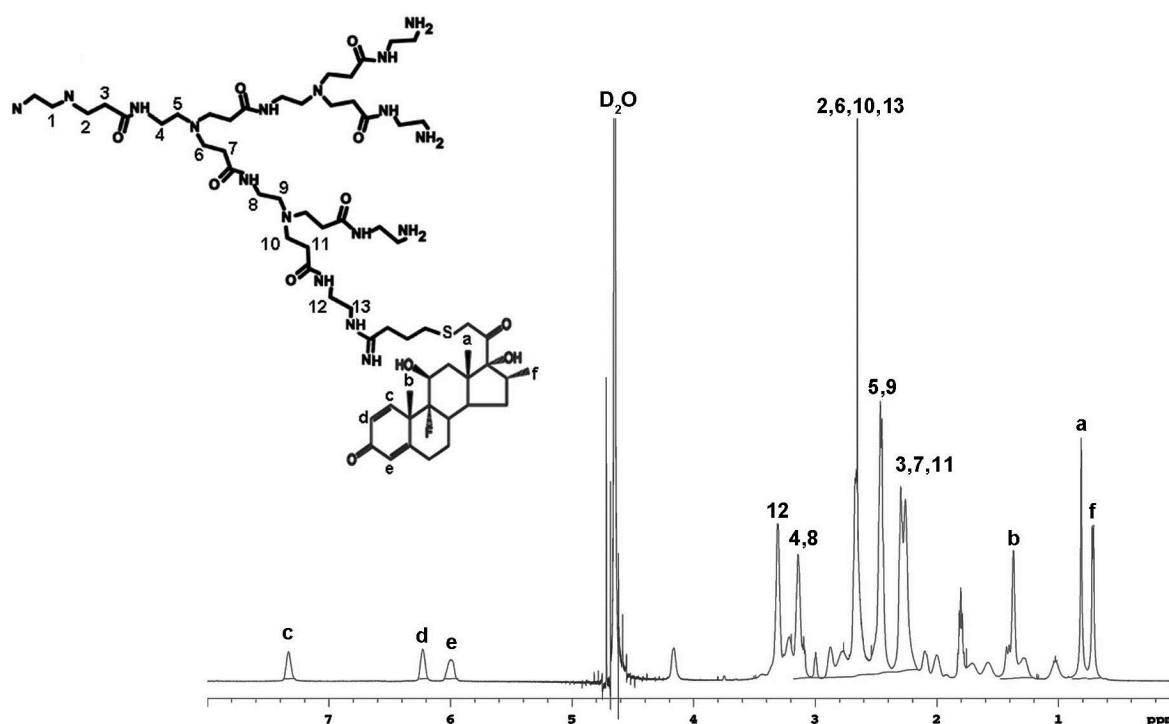

### Supplementary Fig. 1. NMR analysis

The synthesized PAM-D was analyzed by nuclear magnetic resonance (NMR; VNMR-600, Varian, USA). Ten milligrams of PAM-D was dissolved in 0.6 ml of D<sub>2</sub>O in the NMR tube. The sample was subjected to <sup>1</sup>H NMR analysis at 600MHz.

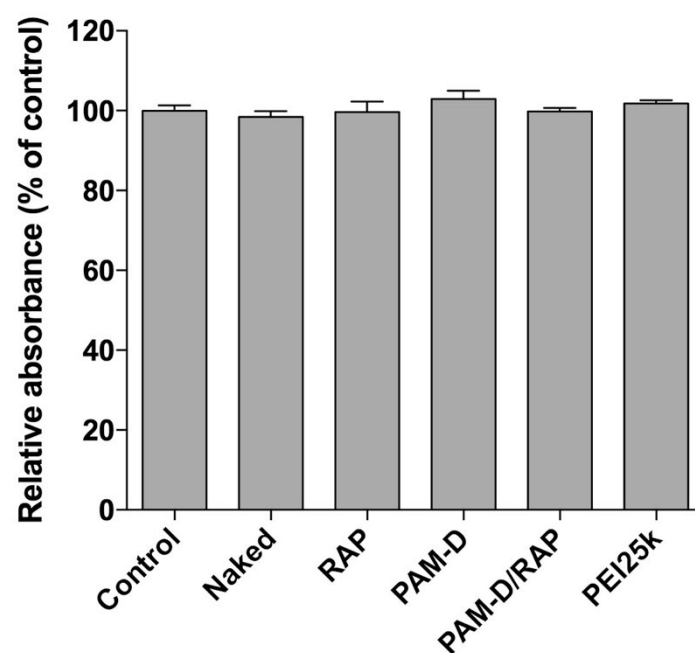

**Supplementary Fig. 2. Effects of nanoparticles on MTT assay.**

The pEmpty/RAP, pEmpty/PAM-D, pEmpty/PAM-D/RAP and pEmpty/PEI25K complexes were prepared at their optimal ratios. The control was distilled water. The 20  $\mu$ l of 5 mg/ml MTT solution was added to each well in a 24 well microassay plate and incubated for 4 h at 37°C. Then, the 500  $\mu$ l of DMSO was added to complexes. The absorbance of each well at 570 nm was measured using a microplate reader.
